# Supplementary material for: The bHLH transcription factor GmPIB1 facilitates resistance to Phytophthora sojae in Glycine max
Source: PubMed Central journal article supplement (PMC5920285; doi:10.1093/jxb/ery103), 2018-03-22
Supplement: ery103_suppl_supplementary_figures_and_tables.pdf [file ery103_suppl_supplementary_figures_and_tables.pdf]

# The bHLH Transcription Factor GmPIB1 Facilitates Resistance to *Phytophthora sojae* in *Glycine max*

Qun Cheng<sup>1, 2†</sup>, Lidong Dong<sup>1, 2†</sup>, Tianjiao Gao<sup>1†</sup>, Tengfei Liu<sup>1†</sup>, Ninghui Li<sup>1, 3†</sup>, Le Wang<sup>1†</sup>, Xin Chang<sup>1</sup>, Junjiang Wu<sup>4</sup>, Pengfei Xu<sup>1\*</sup> and Shuzhen Zhang<sup>1\*</sup>

<sup>1</sup>Soybean Research Institute/Key Laboratory of Soybean Biology of Chinese Education Ministry, Northeast Agricultural University, Harbin 150030, China

<sup>2</sup>School of Life Sciences, Guangzhou University, Guangzhou 510006, China

<sup>3</sup>Jiamusi Branch Academy of Heilongjiang Academy of Agricultural Sciences, Jiamusi 154000, China

<sup>4</sup>Soybean Research Institute of Heilongjiang Academy of Agricultural Sciences, Key Laboratory of Soybean Cultivation of Ministry of Agriculture P. R. China, Harbin 150086, China

ORCID IDs: 0000-0002-3311-0092 (S.Z.)

Qun Cheng, E-mail: chengqun0118@126.com

Lidong Dong, E-mail: donglidong1021@126.com

Tianjiao Gao, E-mail: 1027766012@qq.com

Tengfei Liu, E-mail: lafite15@outlook.com

Ninghui Li, E-mail: lnh000@163.com

Le Wang, E-mail: 770207082@qq.com

Xin Chang, E-mail: 18246197122@163.com

Junjiang Wu, E-mail: nkywujj@126.com

Pengfei Xu, E-mail: xupengfei@neau.edu.cn

Shuzhen Zhang, E-mail: zhangshuzhen@neau.edu.cn

†contributed equally to this research

\*correspondence author

Pengfei Xu, Tel:+86 451 55191487 E-mail: xupengfei@neau.edu.cn

Shuzhen Zhang, Tel:+86 451 55191487 E-mail: zhangshuzhen@neau.edu.cn



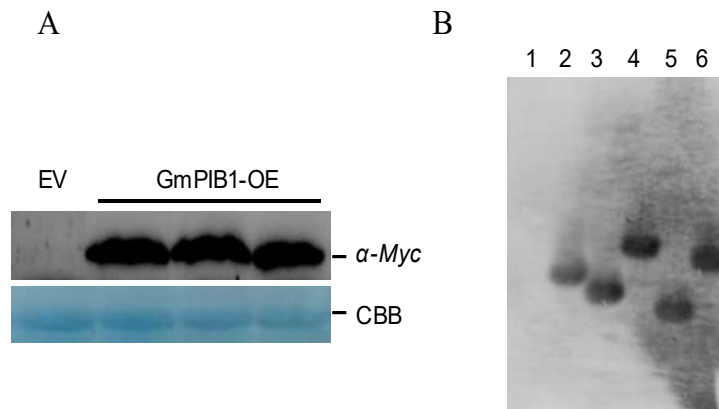

**Figure S2. Resistance analysis of GmPIB1 transgenic soybean hairy roots.** A. Immunoblots showing the expression of GmPIB1-Myc fusion protein in three independent *GmPIB1*-OE soybean hairy roots and the EV controls. The total protein extracts were analyzed in a 12% SDS-PAGE gel and probed with an anti-Myc antibody for the immunoblot. Coomassie Brilliant Blue (CBB) stain was used as a loading control. B. The *GmPIB1*-RNAi transgenic soybean hairy roots were tested using Southern blot. Lane 1, non-transformed soybean genomic DNA as a negative control; line 2, EV transformed soybean plants genomic DNA; lanes 3–6, *GmPIB1*-RNAi transformed soybean plants genomic DNA. Twenty micrograms of genomic DNA digested by the restriction enzyme Hind III was hybridized with the probe derived from the bar gene.

1  
2  
3  
4  
5  
6  
7  
8  
9  
10  
11  
12  
13  
14  
15  
16  
17  
18  
19  
20  
21  
22  
23  
24  
25  
26  
27  
28  
29

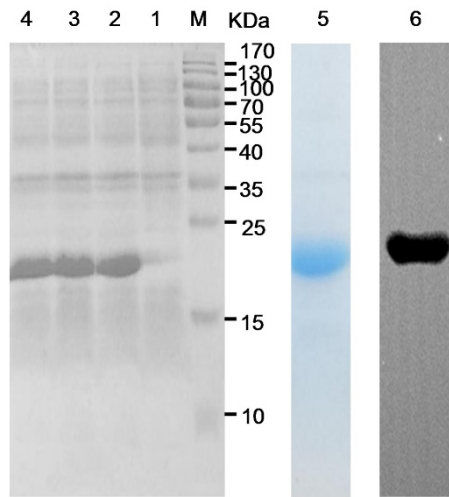

**Figure S3. Expression and purification of fusion protein.** After IPTG induction, *Transetta* cells containing *pET29b-GmPIB1* were grown at 37 °C for 1, 2, or 4 h. Lane 1, protein of total cells without IPTG induction; lane 2, protein of total cells with IPTG induction for 1 h; lane 3, protein of total cells with IPTG induction for 2 h; lane 4, induction for 4 h; lane 5, recombinant GmPIB1 protein purified with Nickel-CL agarose affinity chromatography; M, molecular marker; Lane 6, western blotting of the purified recombinant GmPIB1 protein with an anti-His tag primary antibody probe.

1 **Supplemental Table 1. List of Primers Used in This Study.**

2 **Primers for quantitative real-time PCR**

| Primer name                     | Primers (5'-3')           |
|---------------------------------|---------------------------|
| <i>PIB1-qPCR-F</i>              | CATCAATCTCCCAAGACGAA      |
| <i>PIB1-qPCR-R</i>              | AGCACATCAAGTCCCAGTTC      |
| <i>IFR-qPCR-F</i>               | GAGGAGGATAGTGAGGGCAA      |
| <i>IFR-qPCR-R</i>               | CCTGATGTGAACACCAGAGATG    |
| <i>WRKY27-qPCR-F</i>            | AGGAACTGAAGCGGGTGA        |
| <i>WRKY27-qPCR-R</i>            | TTCGCAAAGTGTTGTAGTTCTC    |
| <i>SPOD-qPCR-F</i>              | AGACGGTGACGAGAAGCAAC      |
| <i>SPOD-qPCR-R</i>              | CGTGCTGCGATAACAAGGAT      |
| <i>SOD-qPCR-F</i>               | AACCACTGCCAACCAGGACC      |
| <i>SOD-qPCR-R</i>               | ATGCTCCCAAACATCAATACCAA   |
| <i>APX-qPCR-F</i>               | GCACTCTGCTGGAACCTTTG      |
| <i>APX-qPCR-R</i>               | TGTCAAGACCGTTGTAGCG       |
| <i>CAT-qPCR-F</i>               | GATATTCTCTTATGCTGATTCACAA |
| <i>CAT-qPCR-R</i>               | TTGACCTCCTCATCCCTGTG      |
| <i>NAC29-qPCR-F</i>             | TACCTTTGTAACCAAGCCACCTC   |
| <i>NAC29-qPCR-R</i>             | TGACACGGTTGCTCGGTTAG      |
| <i>GPX-qPCR-F</i>               | CACTCAAGCCAGAACAACCC      |
| <i>GPX-qPCR-R</i>               | GGTTTGTAGGGAAAGGGCAG      |
| <i>MYB174-qPCR-F</i>            | TTTTCGGAATGACTCTATTTGTAAC |
| <i>MYB174-qPCR-R</i>            | ACGAATGTTTAGAGGTATCGGTTT  |
| <i>EF1 <math>\beta</math>-F</i> | CCACTGCTGAAGAAGATGATGATG  |
| <i>EF1 <math>\beta</math>-R</i> | AAGGACAGAAGACTTGCCACTC    |

3

4 **Primers for constructs in plant transformation**

| Primer name           | Primers (5'-3')              |
|-----------------------|------------------------------|
| <i>GmPIB1-MycF</i>    | GAAGATCTATGGATTCTAGGCGGCGT   |
| <i>GmPIB1-MycR</i>    | GCACGTGATCCATGTTTTGGATTGCTTG |
| <i>GmPIB1RNAi1-F</i>  | CTCGAGGTCACTGTAGAAACCCTA     |
| <i>GmPIB1RNAi1-R</i>  | GAGCTCACTTTCTCCTCCGACTGCT    |
| <i>GmPIB1RNAi2-F</i>  | GGATCCGTCACTGTAGAAACCCTA     |
| <i>GmPIB1RNAi2-R</i>  | TCTAGAACTTTCTCCTCCGACTGCT    |
| <i>GmSPODIRNAi1-F</i> | CTCGAGGAACCATCGAAACGGACCCA   |
| <i>GmSPODIRNAi1-R</i> | GAGCTCTCCTGGTCAGAAGTGAACACT  |
| <i>GmSPODIRNAi2-F</i> | GGATCCGAACCATCGAAACGGACCCA   |
| <i>GmSPODIRNAi2-R</i> | TCTAGATCCTGGTCAGAAGTGAACACT  |

5

6 **Primers for GUS assays**

| Primer name      | Primers (5'-3')            |
|------------------|----------------------------|
| <i>GmPIB1-PF</i> | AAGCTTATTGGATTGGCAGTAGCGG  |
| <i>GmPIB1-PR</i> | GGATCCTGTTTGTTCCTCACGACTAC |

|                  |                              |
|------------------|------------------------------|
| <i>GmSPOD1PF</i> | CAAGCTTAAGTTCTTTCTGGGGCTGGAG |
| <i>GmSPOD1PR</i> | TCTAGATTGAGAAGCCAATACAAGGGAA |

1

2 **Oligos for EMSA probes**

| Primer name        | Primers (5'-3')                             |
|--------------------|---------------------------------------------|
| <i>E-box-F</i>     | AGGAGAGTGGGCC <u>CANNTG</u> CGCTCTTTTGCATTC |
| <i>E-box-R</i>     | GAATGCAAAAGAGCGC <u>CANNTG</u> GCCCACTCTCCT |
| <i>mE-box-F</i>    | AGGAGAGTGGGCC <u>CNNCG</u> CGCTCTTTTGCATTC  |
| <i>mE-box-R</i>    | GAATGCAAAAGAGCGC <u>CGNNG</u> GCCCACTCTCCT  |
| <i>GmPIB1-HISF</i> | <u>GGAATTCC</u> CATGGATTCTAGGCGGCGT         |
| <i>GmPIB1-HISR</i> | <u>GCTCGAGATCC</u> ATGTTTTGGATTGCTTG        |

3

4 **Primers for ChIP assays**

| Primer name       | Primers (5'-3')              |
|-------------------|------------------------------|
| <i>GmSPOD1-aF</i> | F: TATTGATTTGTGAATGAGGTGAGA  |
| <i>GmSPOD1-aR</i> | R: TAACCTCTTCCCTACACCTAATC   |
| <i>GmSPOD1-bF</i> | F: AACAATATTGGTGTAATTATTGG   |
| <i>GmSPOD1-bR</i> | R: TTTATGTGTAAGTTTCAACATTCC  |
| <i>GmSPOD1-cF</i> | F: ATCGCTATAATCATAATGAAAAA   |
| <i>GmSPOD1-cR</i> | R: ATTATTTTGTGTTTTGACATGTGAA |
| <i>GmSPOD1-dF</i> | F: CGAAGACGCGTTGAAGTGT       |
| <i>GmSPOD1-dR</i> | R: GATGGCTGCTATTGTTTATGG     |
| <i>GmSPOD1-eF</i> | F: ACCAAACTGTCTCAAAGAACCA    |
| <i>GmSPOD1-eR</i> | R: TAGCAATGACCGAGTCTAAAAC    |

5

6 **Primers for constructs in Subcellular Localization assays**

| Primer name      | Primers (5'-3')                      |
|------------------|--------------------------------------|
| <i>GmPIB1-GF</i> | <u>GAAGATCTC</u> CATGGATTCTAGGCGGCGT |
| <i>GmPIB1-GR</i> | <u>GACTAGTATCC</u> ATGTTTTGGATTGCTTG |

7

8 **Primers for constructs in BiFC assays**

| Primer name      | Primers (5'-3')                    |
|------------------|------------------------------------|
| <i>GmPIB1-BF</i> | <u>GAATTCATGGATTCTAGGCGGCGTGGT</u> |
| <i>GmPIB1-BR</i> | GGATCCAATCCATGTTTTGGATTGCT         |

9
